# Supplementary material for: Patient pathways of tuberculosis care-seeking and treatment: an individual-level analysis of National Health Insurance data in Taiwan
Source: PubMed Central journal article supplement (PMC7307534; doi:10.1136/bmjgh-2019-002187), 2020-06-21
Supplement: bmjgh-2019-002187supp003.pdf [file bmjgh-2019-002187supp003.pdf]

## Algorithms

---

### Algorithm 1: Patient pathway extraction: overview

---

**Data:** *records*: an array of healthcare records of an individual  
*TOR*: Time-out of *Related illness*  
*TOE*: Time-out of *Evaluation*  
*TOT*: Time-out of *Treatment*

**Result:** Patient pathways of a TB patient

```

1 /* Initialise dimensions */;
2 rel ← New Related illness dimension;
3 eva ← New Evaluation dimension;
4 tre ← New Treatment dimension;
5 /* Read all records in each dimension */;
6 rel.readRecords(TOR, records);
7 eva.readRecords(TOE, records);
8 tre.readRecords(TOT, records);
9 /* Collect dimensions and cut them into episodes */;
10 episodes ← cutEpisodes(rel, eva, tre);
11 pathways ← ∅ /* Initialise a empty set collecting pathways*/;
12 foreach episode ∈ episodes do
13   | pathway ← formulatePathway(episode);
14   | pathways.append(pathway)
15 end
16 return pathways;

```

---

See *dim.readRecords(...)* in Algorithm 2

See *cutEpisodes(...)* in Algorithm 3

See *formulatePathway(...)* in Algorithm 4

**Algorithm 2:** Read records in each dimension (*dim.readRecords(...)*)

---

**Data:** *dim*: dimension, *rel*, *eva*, or *tre*  
*timeout*: timeout for the selected dimension  
*records*: an array of healthcare records of an individual

**Result:** the transition history in the dimension

```

1 /* Initialise the dimension with a Null event */;
2  $time_{curr} \leftarrow 0$ ;
3  $time_{wait} \leftarrow \infty$  /* the end of waiting time */;
4  $state \leftarrow Null$ ;
5 Initialise dim with state at  $time_{curr}$ ;
6 foreach record  $\in$  records do
7    $time_{curr} \leftarrow$  time of record;
8   if  $time_{curr} > time_{wait}$  then
9     /* Reset state */;
10     $time_{wait} \leftarrow \infty$  /* the end of waiting time */;
11     $state \leftarrow Null$ ;
12    dim transits to Null at  $time_{wait}$ ;
13  end
14  if record is relevant to dim then
15     $time_{wait} \leftarrow time_{curr} + timeout$ ;
16    if record can progress state then
17      /* Progress */;
18       $state \leftarrow$  the matched state of record;
19      dim transits to state at  $time_{curr}$ ;
20    end
21  end
22 end
23 /* Close record reading */;
24 dim transits to Null at  $time_{wait}$ ;

```

---

---

**Algorithm 3:** Collect dimensions and cut them by periods without events  
(*cutEpisodes(...)*)

---

**Data:** *rel*: state history in related illness dimension

*eva*: state history in evaluation dimension

*tre*: state history in treatment dimension

**Result:** A set of care seeking episodes

```

1 ts ← ∅ /* A collection storing state transition times */;
2 foreach dim ∈ [rel, eva, tre] do
3   | forall State transition time t of dim do ts.add(t);
4 end
5 Remove duplicated time points in ts Sort ts (ascending);
6 episodes = ∅ /* A collection for storing episodes */;
7 foreach t ∈ ts do
8   | if all[rel, eva, tre] are Null at t then
9     | /* Separate state-transition history*/;
10    | x ← state history before t split from rel;
11    | y ← state history before t split from eva;
12    | z ← state history before t split from tre;
13    | /* Join dimensions */;
14    | episode ← [x, y, z];
15    | episodes.append(episode);
16    | end
17 end
18 return episode;

```

---

**Algorithm 4:** Patient pathway formulation (*formulatePathway(...)*)

---

**Data:** *episode*: an episode with state transition history in *rel*, *eva*, and *tre*

**Result:** A patient pathway

```

1 /* Identify key information */;
2  $t_{eva} \leftarrow$  time of first evaluation possibly for TB;
3  $t_{det} \leftarrow$  time of first evaluation probably for TB;
4  $t_{tre} \leftarrow$  time of the start of first regular TB treatment;
5 /* Group state transition history */;
6  $history_{eva} \leftarrow$  history between  $t_{eva}$  and  $t_{det}$ ;
7  $history_{det} \leftarrow$  history between  $t_{det}$  and  $t_{tre}$ ;
8  $history_{tre} \leftarrow$  history after  $t_{tre}$ ;
9 /* Start to construct pathway */;
10  $pathway \leftarrow \emptyset$  /* Initialise patient pathway */;
11  $state \leftarrow$  initial state of episode;
12 put  $state$  into  $pathway$  ;
13  $ie \leftarrow False$  /* indicating had interrupted evaluation or not */;
14 /* Read state series in Evaluating Stage */;
15 foreach  $dimensions \in history_{eva}$  do
16 |  $state \leftarrow$  find an state in Evaluating Stage matched  $dimensions$  and
17 |  $ie$ ;
18 | if  $state$  is Interrupted Evaluation then  $ie \leftarrow True$ ;
19 | put  $state$  into  $pathway$  ;
20 end
21 /* Read state series in TB Detecting Stage */;
22 foreach  $dimensions \in history_{det}$  do
23 |  $state \leftarrow$  find an state in TB Detecting Stage matched  $dimensions$ 
24 | and  $ie$ ;
25 | if  $state$  is Interrupted Evaluation then  $ie \leftarrow True$ ;
26 | put  $state$  into  $pathway$  ;
27 end
28 /* Read state series in Treating Stage */;
29  $state \leftarrow$  find the initial treatment level in  $history_{tre}[0]$ ;
30 put  $state$  into  $pathway$  ;
31 foreach  $dimensions \in history_{tre}[0:]$  do
32 |  $state \leftarrow$  find the treatment level in  $dimensions$ ;
33 | if  $treatment$  level increased then
34 | | put Treatment Change into  $pathway$  ;
35 | end
36 | put  $state$  into  $pathway$  ;
37 end
38 /* Finalise patient patient formulation */;
39  $state \leftarrow$  find the treatment outcome ;
40 put  $state$  with the time of treatment end into  $pathway$ ;
41 return  $pathway$ ;

```

---
