# Supplementary material for: Patient pathways of tuberculosis care-seeking and treatment: an individual-level analysis of National Health Insurance data in Taiwan
Source: PubMed Central journal article supplement (PMC7307534; doi:10.1136/bmjgh-2019-002187), 2020-06-21
Supplement: bmjgh-2019-002187supp004.pdf [file bmjgh-2019-002187supp004.pdf]

| <b>Description</b>   | <b>programming language</b> | <b>URL</b>                                                                                                            |
|----------------------|-----------------------------|-----------------------------------------------------------------------------------------------------------------------|
| Online demonstration |                             | <a href="https://patientpathwayanalysis.github.io/">https://patientpathwayanalysis.github.io/</a>                     |
| Example data         |                             | <a href="https://github.com/PatientPathwayAnalysis/IPPA-data">https://github.com/PatientPathwayAnalysis/IPPA-data</a> |
| Pathway extraction   | python 3.6                  | <a href="https://github.com/PatientPathwayAnalysis/IPPA-py">https://github.com/PatientPathwayAnalysis/IPPA-py</a>     |
| Visualisation        | R 3.5.1, ggplot2            | <a href="https://github.com/PatientPathwayAnalysis/IPPA-vis">https://github.com/PatientPathwayAnalysis/IPPA-vis</a>   |
| Visualisation-d3     | javascript, D3.js v3        | <a href="https://github.com/PatientPathwayAnalysis/IPPA-d3">https://github.com/PatientPathwayAnalysis/IPPA-d3</a>     |
