# Supplementary material for: Patient pathways of tuberculosis care-seeking and treatment: an individual-level analysis of National Health Insurance data in Taiwan
Source: PubMed Central journal article supplement (PMC7307534; doi:10.1136/bmjgh-2019-002187), 2020-06-21
Supplement: bmjgh-2019-002187supp006.pdf [file bmjgh-2019-002187supp006.pdf]

| Stage        | State                               | Description                                                                                                                         |
|--------------|-------------------------------------|-------------------------------------------------------------------------------------------------------------------------------------|
| Waiting      | Waiting                             | Waiting for first TB-related evaluation or treatment                                                                                |
| Evaluating   | Evaluating                          | Being evaluated by procedures which can narrow the possibility down to TB (Evaluations possibly for TB)                             |
|              | Interrupted Evaluation (IE)         | Previous evaluations do not narrow the possibility down to TB because of (1) comorbidity, (2) false negative, or (3) self-referral. |
|              | Re-Evaluating                       | Visiting <b>Evaluating State</b> after <b>Interrupted Evaluation</b>                                                                |
| TB-Detecting | TB-Detecting                        | Being evaluated by procedures which can identify TB (Evaluations probably for TB)                                                   |
|              | Re-Detecting                        | Re-visiting <b>TB-Detecting State</b> after <b>Interrupted Evaluation</b>                                                           |
| Treating     | First-line treatment                | Being treated with first-line TB regimen                                                                                            |
|              | Treatment change                    | Switching between two TB treatments or temporal treatment interruption due to health conditions.                                    |
|              | Second-line treatment / retreatment | Being treated with second-line TB regimen or any regimen after <b>Treatment change</b>                                              |
